# Supplementary material for: Salix daphnoides: A Screening for Oligomeric and Polymeric Proanthocyanidins
Source: PubMed Central journal article supplement (PMC6332011; doi:10.3390/molecules200813764), 2015-07-29
Supplement: molecules-20-13764-s001.pdf [file molecules-20-13764-s001.pdf]

# Supplementary Materials

**Table S1.** NMR data for compounds **3** and **4**.

|            | <b>3</b> (PC B3)                                           |                                                                                             | <b>4</b> (PC B4)                                           |                                                                                             |                                             |
|------------|------------------------------------------------------------|---------------------------------------------------------------------------------------------|------------------------------------------------------------|---------------------------------------------------------------------------------------------|---------------------------------------------|
|            | $\delta_{C, \text{major}} + \delta_{C, \text{minor}}$ type | $\delta_{H, \text{major}}$ ( <i>J</i> in Hz) + $\delta_{H, \text{minor}}$ ( <i>J</i> in Hz) | $\delta_{C, \text{major}} + \delta_{C, \text{minor}}$ type | $\delta_{H, \text{major}}$ ( <i>J</i> in Hz) + $\delta_{H, \text{minor}}$ ( <i>J</i> in Hz) |                                             |
|            | 2                                                          | 84.0 + 84.1, CH                                                                             | 4.25, d (9.7) + 4.35, d (9.1)                              | 83.9 + 84.1, CH                                                                             | 4.41, d (9.7) + 4.31 <sup>i</sup> , m       |
|            | 3                                                          | 73.7 <sup>a</sup> + 73.7 <sup>a</sup> , CH                                                  | 4.35, dd (9.7, 8.0) + 4.51, d (9.1)                        | 73.8 + 73.8, CH                                                                             | 4.56, d (8.0) + 4.31 <sup>i</sup> , m       |
|            | 4                                                          | 38.6 + 38.5, CH                                                                             | 4.40, d (7.9) + 4.49, d (8.0)                              | 38.9 + 38.8, CH                                                                             | 4.62, d (7.9) + 4.46, d (7.1)               |
|            | 4a                                                         | 107.2 + 107.1, C                                                                            |                                                            | 107.2 + 107.4, C                                                                            |                                             |
|            | 5                                                          | 157.1 <sup>b</sup> , C                                                                      |                                                            | 157.5 + 157.2, C                                                                            |                                             |
|            | 6                                                          | 97.3 + 97.5, C                                                                              | 5.88, d (2.4) + 5.80, d (2.3)                              | 97.6 + 97.7, CH                                                                             | 5.79, d (2.1) + 5.89, d (2.1)               |
| Upper unit | 7                                                          | 157.1 <sup>b</sup> + 157.3, C                                                               |                                                            | 157.3 + 157.3, C                                                                            |                                             |
|            | 8                                                          | 96.9 + 96.2, CH                                                                             | 5.78, d (2.4) + 5.83, d (2.4)                              | 96.1 + 97.1, CH                                                                             | 5.83, d (2.3) + 5.93, d (2.2)               |
|            | 8a                                                         | 158.6, C                                                                                    |                                                            | 158.7 + 158.6, C                                                                            |                                             |
|            | 1'                                                         | 132.6 + 132.4, C                                                                            |                                                            | 132.2 + 132.6, C                                                                            |                                             |
|            | 2'                                                         | 116.4 + 116.2 <sup>c</sup> , CH                                                             | 6.73, d (1.9) + 6.95, d (1.9)                              | 116.3 + 116.4, CH                                                                           | 6.98, d (1.9) + 6.69, d (1.9)               |
|            | 3'                                                         | 145.6 + 146.1 <sup>d</sup> , C                                                              |                                                            | 146.5 + 145.6, C                                                                            |                                             |
|            | 4'                                                         | 146.1 + 146.1, C                                                                            |                                                            | 146.0 + 146.1, C                                                                            |                                             |
|            | 5'                                                         | 116.2 + 115.9, CH                                                                           | 6.66, d (8.1) + 6.76, d (8.0)                              | 116.0 <sup>f</sup> + 116.1 <sup>f</sup> , CH                                                | 6.79 <sup>j</sup> , d (7.7) + 6.60, d (8.2) |
|            | 6'                                                         | 120.6 + 121.0, CH                                                                           | 6.46, dd (8.2, 1.9) + 6.81 <sup>e</sup> , dd (8.0, 1.9)    | 121.2 + 120.5, CH                                                                           | 6.86, d (8.0) + 6.41, dd (8.2, 1.8)         |

Table S1. Cont.

|                  | 3 (PC B3) |                                                            | 4 (PC B4)                                                                                  |                                                            |                                                                                            |
|------------------|-----------|------------------------------------------------------------|--------------------------------------------------------------------------------------------|------------------------------------------------------------|--------------------------------------------------------------------------------------------|
|                  | Pos.      | $\delta_{C, \text{major}} + \delta_{C, \text{minor}}$ type | $\delta_{H, \text{major}}$ (J in Hz) + $\delta_{H, \text{minor}}$ (J in Hz)                | $\delta_{C, \text{major}} + \delta_{C, \text{minor}}$ type | $\delta_{H, \text{major}}$ (J in Hz) + $\delta_{H, \text{minor}}$ (J in Hz)                |
| Terminal<br>unit | 2         | 82.5 + 82.9, CH                                            | 4.53, d (7.3) + 4.74, d (7.3)                                                              | 80.0 + 79.9, CH                                            | 4.93, bs + 4.80, bs                                                                        |
|                  | 3         | 68.9 + 68.6, CH                                            | 3.78, m + 4.06, m                                                                          | 67.4 + 67.8, CH                                            | 4.22, m + 4.05, m                                                                          |
|                  | 4         | 28.8 + 28.5, CH <sub>2</sub>                               | 2.48, dd (16.2, 8.0) + 2.58, dd (16.1, 7.7)<br>2.75, dd (16.3, 5.5) + 2.81, dd (16.2, 5.4) | 30.1 + 29.4, CH <sub>2</sub>                               | 2.82, dd (16.9, 1.7) + 2.70, dd (17.1, 2.3)<br>2.92, dd (16.8, 4.4) + 2.86, dd (17.0, 5.0) |
|                  | 4a        | 102.2 + 100.5, C                                           |                                                                                            | 99.4 + 101.5, C                                            |                                                                                            |
|                  | 5         | 155.9 + 155.8, C                                           |                                                                                            | 156.4 + 156.3, C                                           |                                                                                            |
|                  | 6         | 96.1 + 97.5, C                                             | 6.06, s + 5.93, s                                                                          | 97.5 + 96.4, CH                                            | 5.95, s + 6.09, s                                                                          |
|                  | 7         | 155.7, C                                                   |                                                                                            | 155.9 <sup>g</sup> + 155.9 <sup>g</sup> , C                |                                                                                            |
|                  | 8         | 108.2 + 108.3, C                                           |                                                                                            | 108.7 + 108.3, C                                           |                                                                                            |
|                  | 8a        | 154.9 + 155.0, C                                           |                                                                                            | 155.4 <sup>h</sup> + 155.4 <sup>h</sup> , C                |                                                                                            |
|                  | 1'        | 131.8 + 132.2, C                                           |                                                                                            | 132.4 + 131.7, C                                           |                                                                                            |
|                  | 2'        | 115.5 + 115.2, CH                                          | 6.58, d (1.9) + 6.95, d (1.9)                                                              | 115.3 + 114.8, CH                                          | 7.08, d (1.6) + 6.67, d (1.8)                                                              |
|                  | 3'        | 145.5 + 146.1 <sup>d</sup> , C                             |                                                                                            | 146.2 + 145.6, C                                           |                                                                                            |
|                  | 4'        | 145.8 + 146.1 <sup>d</sup> , C                             |                                                                                            | 145.7 + 145.6, C                                           |                                                                                            |
|                  | 5'        | 116.1 + 116.1 <sup>e</sup> , C                             | 6.67, d (8.2) + 6.75, d (8.2)                                                              | 116.1 + 115.9, CH                                          | 6.77 <sup>j</sup> , d (8.2) + 6.71, d (8.2)                                                |
|                  | 6'        | 119.9 + 120.2, C                                           | 6.25, dd (8.2, 1.9) + 6.82 <sup>e</sup> , dd (8.2, 1.8)                                    | 119.1 + 120.3, CH                                          | 6.86, d (8.0) + 6.44, dd (8.2, 1.8)                                                        |

<sup>a-j</sup> Signals with the same letter are overlapped.

**Table S2.** NMR data for compounds **5** and **6**.

|             | <b>5 (PC C1)</b> |                             |                                  | <b>6 (Epicatechin-<math>\beta</math>(4<math>\rightarrow</math>8)-epicatechin-<math>\beta</math>(4<math>\rightarrow</math>8)-catechin)</b> |                             |                                  |                                  |
|-------------|------------------|-----------------------------|----------------------------------|-------------------------------------------------------------------------------------------------------------------------------------------|-----------------------------|----------------------------------|----------------------------------|
|             | Pos.             | $\delta_C$ type ( $-40$ °C) | $\delta_H$ (J in Hz) ( $-40$ °C) | $\delta_H$ (J in Hz) ( $-20$ °C)                                                                                                          | $\delta_C$ type ( $-40$ °C) | $\delta_H$ (J in Hz) ( $-40$ °C) | $\delta_H$ (J in Hz) ( $-20$ °C) |
| upper unit  | 2                | 76.8, CH                    | 5.08, bs                         | 5.07, bs                                                                                                                                  | 76.7, CH                    | 5.08 <sup>f</sup> , bs           | 5.07, bs                         |
|             | 3                | 73.5, CH                    | 3.95, d (1.9)                    | 3.97, d (1.9)                                                                                                                             | 73.5, CH                    | 3.98, d (1.6)                    | 3.99, d (1.8)                    |
|             | 4                | 36.9, CH                    | 4.68, bs                         | 4.69, m                                                                                                                                   | 36.8, CH                    | 4.67, bs                         | 4.68, bs                         |
|             | 4a               | 101.4, C                    |                                  |                                                                                                                                           | 101.9, C                    |                                  |                                  |
|             | 5                | 157.2 <sup>l</sup> , C      |                                  |                                                                                                                                           | 158.0 <sup>p</sup> , C      |                                  |                                  |
|             | 6                | 95.7 <sup>m</sup> , CH      | 5.96 <sup>n</sup> , d (2.3)      | 5.97 <sup>o</sup> , d (2.4)                                                                                                               | 95.8 <sup>q</sup> , CH      | 5.95 <sup>r</sup> , d (2.3)      | 5.97 <sup>s</sup> , d (2.4)      |
|             | 7                | 158.3, C                    |                                  |                                                                                                                                           | 157.8 <sup>e</sup> , C      |                                  |                                  |
|             | 8                | 95.8 <sup>m</sup> , CH      | 5.98 <sup>n</sup> , d (2.3)      | 6.00 <sup>o</sup> , d (2.3)                                                                                                               | 95.8 <sup>q</sup> , CH      | 5.99 <sup>r</sup> , d (2.3)      | 5.98 <sup>s</sup> , d (2.4)      |
|             | 8a               | 157.4 <sup>l</sup> , C      |                                  |                                                                                                                                           | 157.8 <sup>e,m</sup> , C    |                                  |                                  |
|             | 1'               | 132.6, C                    |                                  |                                                                                                                                           | 132.5, C                    |                                  |                                  |
|             | 2'               | 114.9, CH                   | 6.89 <sup>a</sup> , d (1.7)      | 6.89 <sup>c</sup> , d (1.8)                                                                                                               | 114.8, CH                   | 6.90 <sup>g</sup> , d (1.6)      | 6.90 <sup>i</sup> , d (1.8)      |
|             | 3'               | 145.6, C                    |                                  |                                                                                                                                           | 145.6, C                    |                                  |                                  |
|             | 4'               | 145.3, C                    |                                  |                                                                                                                                           | 145.3, C                    |                                  |                                  |
|             | 5'               | 115.7, CH                   | 6.73, d (8.2)                    | 6.73 <sup>d</sup> , d (8.1)                                                                                                               | 115.7, CH                   | 6.73 <sup>h</sup> , d (8.3)      | 6.74 <sup>j</sup> , d (8.0)      |
| 6'          | 118.9, CH        | 6.64–6.70 <sup>b</sup>      | 6.70 <sup>d</sup>                | 118.9, CH                                                                                                                                 | 6.66–6.70 <sup>h</sup>      | 6.67–6.72 <sup>j</sup>           |                                  |
| Middle unit | 2                | 76.7, CH                    | 5.26, bs                         | H <sub>2</sub> O-signal                                                                                                                   | 76.8, CH                    | 5.31, bs                         | 5.29, bs                         |
|             | 3                | 73.2, CH                    | 3.90, d (2.1)                    | 3.93, d (2.0)                                                                                                                             | 72.4, CH                    | 4.07, d (1.6)                    | 4.07, d (1.7)                    |
|             | 4                | 37.1, CH                    | 4.68, bs                         | 4.69, m                                                                                                                                   | 37.0, CH                    | 4.77, bs                         | 4.76, bs                         |
|             | 4a               | 102.0, C                    |                                  |                                                                                                                                           | 102.5, C                    |                                  |                                  |
|             | 5                | 157.0, C                    |                                  |                                                                                                                                           | 157.0, C                    |                                  |                                  |
|             | 6                | 96.6, CH                    | 5.88, s                          | 5.89, s                                                                                                                                   | 96.6, CH                    | 5.87, s                          | 5.88, s                          |
|             | 7                | 155.9, C                    |                                  |                                                                                                                                           | 156.8, C                    |                                  |                                  |
|             | 8                | 106.8, C                    |                                  |                                                                                                                                           | 106.2, C                    |                                  |                                  |
|             | 8a               | 154.1, C                    |                                  |                                                                                                                                           | 154.9, C                    |                                  |                                  |
|             | 1'               | 132.6, C                    |                                  |                                                                                                                                           | 132.8, C                    |                                  |                                  |
|             | 2'               | 114.8, CH                   | 7.02, d (1.3)                    | 7.02, d (1.6)                                                                                                                             | 114.6, CH                   | 7.04, d (1.5)                    | 7.04, d (1.7)                    |
|             | 3'               | 145.8, C                    |                                  |                                                                                                                                           | 145.7, C                    |                                  |                                  |
|             | 4'               | 145.3, C                    |                                  |                                                                                                                                           | 145.1, C                    |                                  |                                  |
|             | 5'               | 115.7, CH                   | 6.64–6.70 <sup>b</sup>           | 6.71 <sup>d</sup> , d (8.6)                                                                                                               | 115.7, CH                   | 6.68 <sup>h</sup> , d (8.3)      | 6.69, d (8.2)                    |
| 6'          | 118.4, CH        | 6.64–6.70 <sup>b</sup>      | 6.69 <sup>d</sup> , d (6.9)      | 118.5, CH                                                                                                                                 | 6.78, dd (8.1, 1.7)         | 6.79, dd (8.2, 1.9)              |                                  |

Table S2. Cont.

|                  | 5 (PC C1) |                             |                                        | 6 (Epicatechin- $\beta$ (4 $\rightarrow$ 8)-epicatechin- $\beta$ (4 $\rightarrow$ 8)-catechin) |                             |                                              |                                                                          |
|------------------|-----------|-----------------------------|----------------------------------------|------------------------------------------------------------------------------------------------|-----------------------------|----------------------------------------------|--------------------------------------------------------------------------|
|                  | Pos.      | $\delta_C$ type ( $-40$ °C) | $\delta_H$ (J in Hz) ( $-40$ °C)       | $\delta_H$ (J in Hz) ( $-20$ °C)                                                               | $\delta_C$ type ( $-40$ °C) | $\delta_H$ (J in Hz) ( $-40$ °C)             | $\delta_H$ (J in Hz) ( $-20$ °C)                                         |
| Terminal<br>unit | 2         | 79.4, CH                    | 4.99, bs                               | 4.99, bs                                                                                       | 81.3, CH                    | 5.06 <sup>f</sup> , d (4.6)                  | 5.02, d (4.7)                                                            |
|                  | 3         | 66.8, CH                    | 4.30, m                                | 4.31, m                                                                                        | 68.0, CH                    | 4.21, q (4.7)                                | 4.19, dd (10.2, 5.1)                                                     |
|                  | 4         | 29.9, CH <sub>2</sub>       | 2.80, d (16.1)<br>2.95, dd (16.6, 4.1) | 2.81, dd (16.9, 1.8)<br>2.95, dd (16.6, 4.1)                                                   | 25.9, CH <sub>2</sub>       | 2.50, dd (15.7, 2.8)<br>2.62, dd (16.4, 4.4) | 2.56 <sup>k</sup> , dd (16.6, 4.9)<br>2.62 <sup>k</sup> , dd (16.9, 5.2) |
|                  | 4a        | 99.7, C                     |                                        |                                                                                                | 99.8                        |                                              |                                                                          |
|                  | 5         | 156.9, C                    |                                        |                                                                                                | 155.7, C                    |                                              |                                                                          |
|                  | 6         | 97.0, CH                    | 5.93, s                                | 5.93, s                                                                                        | 96.8, CH                    | 5.89, s                                      | 5.89, s                                                                  |
|                  | 7         | 156.1, C                    |                                        |                                                                                                | 156.4, C                    |                                              |                                                                          |
|                  | 8         | 107.5, C                    |                                        |                                                                                                | 108.1, C                    |                                              |                                                                          |
|                  | 8a        | 154.1, C                    |                                        |                                                                                                | 153.6, C                    |                                              |                                                                          |
|                  | 1'        | 132.0, C                    |                                        |                                                                                                | 132.3, C                    |                                              |                                                                          |
|                  | 2'        | 115.0, CH                   | 7.10, d (1.7)                          | 7.11, d (1.8)                                                                                  | 113.5, CH                   | 6.83, d (1.4)                                | 6.86, d (1.8)                                                            |
|                  | 3'        | 146.0, C                    |                                        |                                                                                                | 146.0, C                    |                                              |                                                                          |
|                  | 4'        | 145.3, C                    |                                        |                                                                                                | 145.6, C                    |                                              |                                                                          |
|                  | 5'        | 115.6, CH                   | 6.74, d (8.2)                          | 6.75, d (8.2)                                                                                  | 115.9, CH                   | 6.71 <sup>h</sup> , d (8.3)                  | 6.72 <sup>j</sup> , d (8.0)                                              |
|                  | 6'        | 118.7, CH                   | 6.88 <sup>a</sup> , dd (8.0, 1.5)      | 6.90 <sup>c</sup> , dd (8.2, 1.9)                                                              | 119.0, CH                   | 6.92 <sup>g</sup> , dd (8.5, 1.6)            | 6.90 <sup>i</sup> , dd (8.1, 1.8)                                        |

<sup>a-k</sup> Signals with the same letter are overlapped; <sup>l-s</sup> Signals with the same letter are interchangeable.

**Table S3.** NMR data for compound 7.

| Pos.              | 7 (Epicatechin- $\beta$ (4 $\rightarrow$ 8)-epicatechin- $\beta$ (4 $\rightarrow$ 8)-epicatechin- $\beta$ (4 $\rightarrow$ 8)-catechin) |                                   |                                   |                             |
|-------------------|-----------------------------------------------------------------------------------------------------------------------------------------|-----------------------------------|-----------------------------------|-----------------------------|
|                   | $\delta_C$ type (-40 °C)                                                                                                                | $\delta_H$ (J in Hz) (-40 °C)     | $\delta_H$ (J in Hz) (-20 °C)     |                             |
| Upper unit        | 2                                                                                                                                       | 76.5, CH                          | 5.28, bs                          | H <sub>2</sub> O-signal     |
|                   | 3                                                                                                                                       | 73.2, CH                          | 4.08, d (1.6)                     | 4.10 <sup>g</sup> , d (2.1) |
|                   | 4                                                                                                                                       | 37.3, CH                          | 4.74, bs                          | 4.75, bs                    |
|                   | 4a                                                                                                                                      | 102.3, C                          |                                   |                             |
|                   | 5                                                                                                                                       | 157.9 <sup>a,k</sup> , C          |                                   |                             |
|                   | 6                                                                                                                                       | 95.7 <sup>l</sup> , CH            | 5.96 <sup>m</sup> , d (2.1)       | 5.98 <sup>n</sup> , d (2.3) |
|                   | 7                                                                                                                                       | 158.9, C                          |                                   |                             |
|                   | 8                                                                                                                                       | 95.8 <sup>l</sup> , CH            | 5.99 <sup>m</sup> , d (2.2)       | 6.01 <sup>n</sup> , d (2.3) |
|                   | 8a                                                                                                                                      | 157.9 <sup>a,k</sup> , C          |                                   |                             |
|                   | 1'                                                                                                                                      | 132.6, C                          |                                   |                             |
|                   | 2'                                                                                                                                      | 114.7, CH                         | 7.11, d (1.0)                     | 7.10, d (1.6)               |
|                   | 3'                                                                                                                                      | 145.7 <sup>b</sup> , C            |                                   |                             |
|                   | 4'                                                                                                                                      | 145.1, C                          |                                   |                             |
|                   | 5'                                                                                                                                      | 115.7, CH                         | 6.69–6.72 <sup>d</sup>            | 6.70 <sup>h</sup> , d (8.1) |
| 6'                | 118.4, CH                                                                                                                               | 6.75 <sup>d</sup> , m*            | 6.77, dd (8.5, 1.7)               |                             |
| Upper middle unit | 2                                                                                                                                       | 76.7, CH                          | 5.09 <sup>e</sup> , bs            | 5.08, bs                    |
|                   | 3                                                                                                                                       | 73.6, CH                          | 3.97, d (1.6)                     | 3.99, d (1.8)               |
|                   | 4                                                                                                                                       | 36.9, CH                          | 4.72, bs                          | 4.72, bs                    |
|                   | 4a                                                                                                                                      | 102.1, C                          |                                   |                             |
|                   | 5                                                                                                                                       | 157.3, C                          |                                   |                             |
|                   | 6                                                                                                                                       | 96.8, CH                          | 5.92, s                           | 5.93, s                     |
|                   | 7                                                                                                                                       | 156.7, C                          |                                   |                             |
|                   | 8                                                                                                                                       | 106.5, C                          |                                   |                             |
|                   | 8a                                                                                                                                      | 155.0, C                          |                                   |                             |
|                   | 1'                                                                                                                                      | 132.5, C                          |                                   |                             |
|                   | 2'                                                                                                                                      | 114.9, CH                         | 6.90, d (1.6)                     | 6.90 <sup>i</sup> , d (1.5) |
|                   | 3'                                                                                                                                      | 145.8 <sup>c</sup> , C            |                                   |                             |
|                   | 4'                                                                                                                                      | 145.3, C                          |                                   |                             |
|                   | 5'                                                                                                                                      | 115.7, CH                         | 6.74 <sup>d</sup> , m             | 6.74 <sup>h</sup> , d (8.1) |
| 6'                | 118.9, CH                                                                                                                               | 6.68 <sup>d</sup> , dd (8.1, 1.3) | 6.69 <sup>h</sup> , dd (8.5, 1.7) |                             |

Table S3. Cont.

|                   | Pos.      | 7 (Epicatechin- $\beta$ (4 $\rightarrow$ 8)-epicatechin- $\beta$ (4 $\rightarrow$ 8)-epicatechin- $\beta$ (4 $\rightarrow$ 8)-catechin) |                                              |                                                                          |
|-------------------|-----------|-----------------------------------------------------------------------------------------------------------------------------------------|----------------------------------------------|--------------------------------------------------------------------------|
|                   |           | $\delta_C$ type ( $-40$ °C)                                                                                                             | $\delta_H$ (J in Hz) ( $-40$ °C)             | $\delta_H$ (J in Hz) ( $-20$ °C)                                         |
| Lower middle unit | 2         | 76.8, CH                                                                                                                                | 5.37, bs                                     | 5.34, bs                                                                 |
|                   | 3         | 72.1, CH                                                                                                                                | 4.12, d (1.3)                                | 4.11 <sup>g</sup> , d (2.1)                                              |
|                   | 4         | 37.1, C                                                                                                                                 | 4.79, bs                                     | 4.78, bs                                                                 |
|                   | 4a        | 102.7, C                                                                                                                                |                                              |                                                                          |
|                   | 5         | 157.7, C                                                                                                                                |                                              |                                                                          |
|                   | 6         | 96.8, CH                                                                                                                                | 5.93, s                                      | 5.92, s                                                                  |
|                   | 7         | 156.4, C                                                                                                                                |                                              |                                                                          |
|                   | 8         | 107.0, C                                                                                                                                |                                              |                                                                          |
|                   | 8a        | 154.8, C                                                                                                                                |                                              |                                                                          |
|                   | 1'        | 132.7, C                                                                                                                                |                                              |                                                                          |
|                   | 2'        | 114.8, CH                                                                                                                               | 7.04, d (1.4)                                | 7.05, d (1.7)                                                            |
|                   | 3'        | 145.8 <sup>c</sup> , C                                                                                                                  |                                              |                                                                          |
|                   | 4'        | 145.2, C                                                                                                                                |                                              |                                                                          |
|                   | 5'        | 115.7, CH                                                                                                                               | 6.70 <sup>d</sup> , m                        | 6.72 <sup>h</sup> , m                                                    |
| 6'                | 118.6, CH | 6.82 <sup>f</sup> , m                                                                                                                   | 6.82, dd (8.3, 1.2)                          |                                                                          |
| Terminal unit     | 2         | 81.3, CH                                                                                                                                | 5.08 <sup>e</sup> , d (4.5)                  | 5.04, d (5.0)                                                            |
|                   | 3         | 68.0, CH                                                                                                                                | 4.22, m                                      | 4.19, m                                                                  |
|                   | 4         | 25.9, CH <sub>2</sub>                                                                                                                   | 2.50, dd (16.5, 4.6)<br>2.62, dd (16.7, 4.6) | 2.56 <sup>j</sup> , dd (16.5, 4.6)<br>2.63 <sup>j</sup> , dd (16.7, 4.6) |
|                   | 4a        | 99.8, C                                                                                                                                 |                                              |                                                                          |
|                   | 5         | 155.7, C                                                                                                                                |                                              |                                                                          |
|                   | 6         | 96.5, CH                                                                                                                                | 5.89, s                                      | 5.89, s                                                                  |
|                   | 7         | 157.9 <sup>a</sup> , C                                                                                                                  |                                              |                                                                          |
|                   | 8         | 108.1, C                                                                                                                                |                                              |                                                                          |
|                   | 8a        | 153.6, C                                                                                                                                |                                              |                                                                          |
|                   | 1'        | 132.3, C                                                                                                                                |                                              |                                                                          |
|                   | 2'        | 113.5, CH                                                                                                                               | 6.84 <sup>f</sup> , d (1.3)                  | 6.87, d (1.8)                                                            |
|                   | 3'        | 146.1, C                                                                                                                                |                                              |                                                                          |
|                   | 4'        | 145.7 <sup>b</sup> , C                                                                                                                  |                                              |                                                                          |
|                   | 5'        | 115.7, CH                                                                                                                               | 6.71 <sup>d</sup> , m,                       | 6.72 <sup>h</sup> , m                                                    |
| 6'                | 119.0, CH | 6.93, dd (8.5, 1.3)                                                                                                                     | 6.91 <sup>i</sup> , dd (8.4, 1.7)            |                                                                          |

<sup>a-j</sup> Signals with the same letter are overlapped; <sup>k-n</sup> Signals with the same letter are interchangeable.

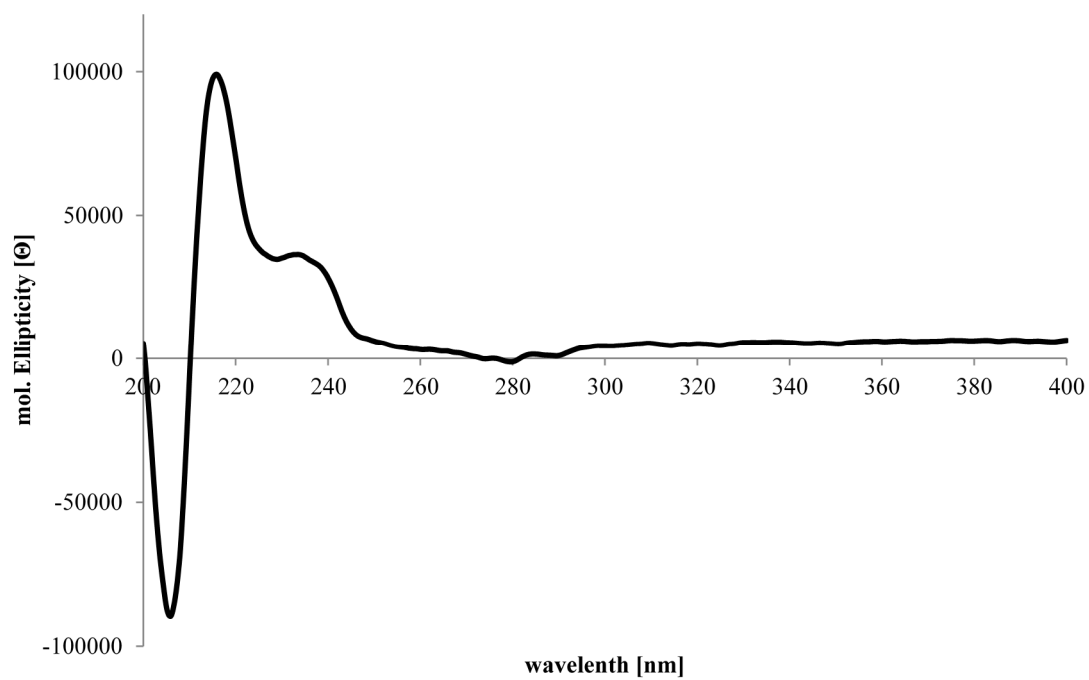

**Figure S1.** CD-spectrum of compound 1.

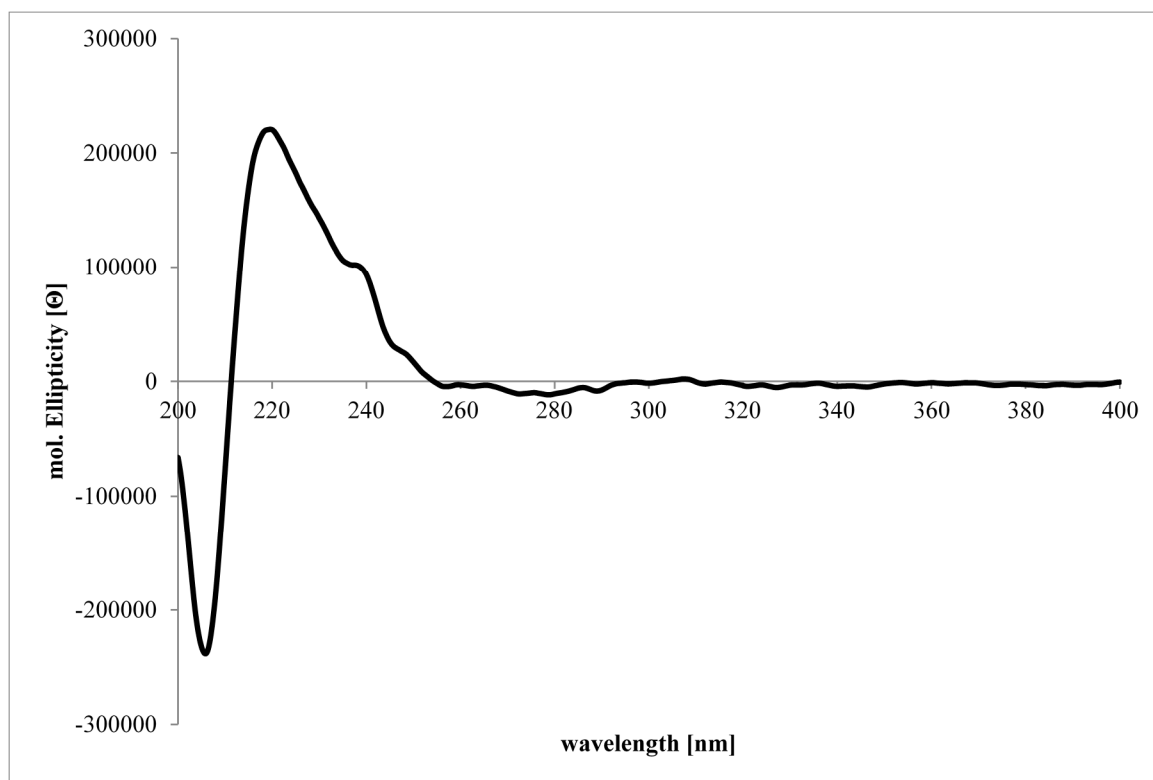

**Figure S2.** CD-spectrum of compound 7.

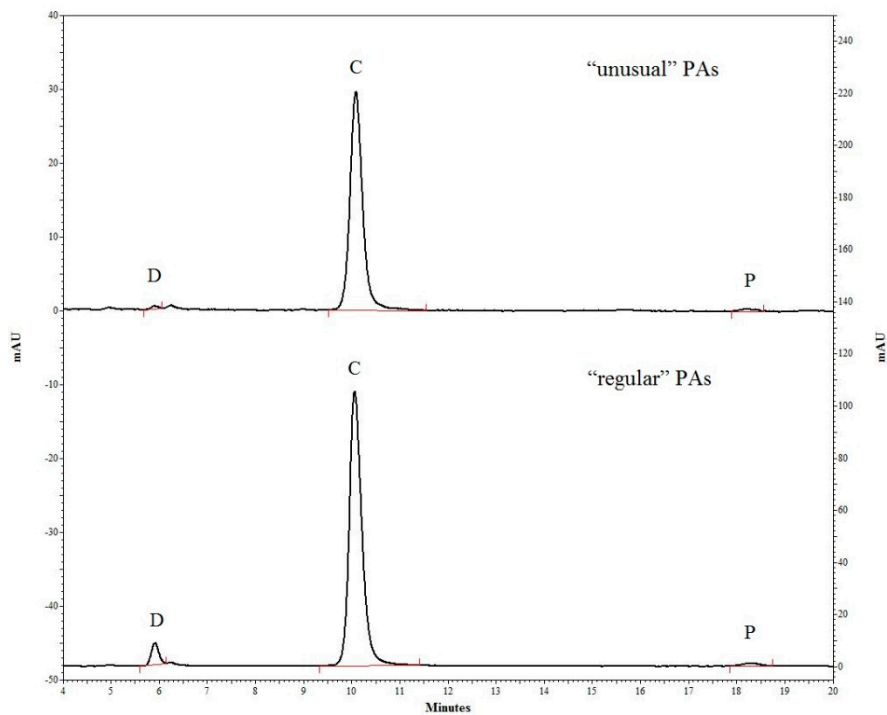

**Figure S3.** HPLC chromatograms after the cleavage reaction achieved by HCl/O<sub>2</sub>. The left y-axis indicates the absorbance of the upper chromatogram (“unusual” PAs) and the right y-axis for the lower one (“regular” PAs) respectively. D = delphinidin, C = cyanidin, P = pelargonidin.

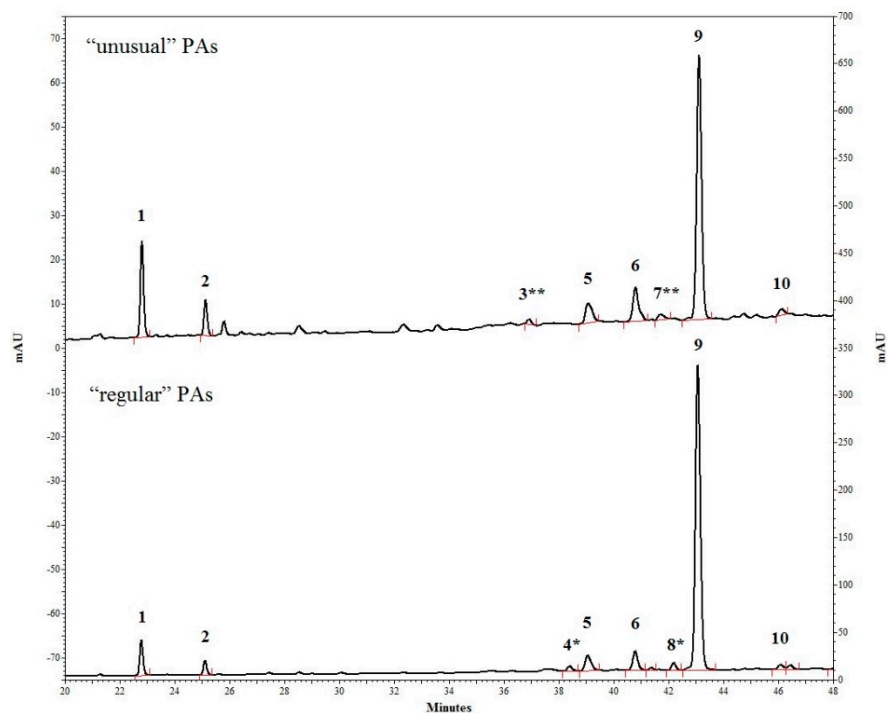

**Figure S4.** HPLC chromatograms after thiolysis. The left y-axis indicates the absorbance of the upper chromatogram (“unusual” PAs) and the right y-axis for the lower one (“regular” PAs), respectively. The peak numbers are explained in Table 2 of the main text.
